# Supplementary material
Source: Springer Nature journal article supplement (https://www.springermedizin.de/resource/supplementary/12889_2011_3496_MOESM1_ESM.pdf/9489198)

### A. Total Diabetes

■ Men ■ Women ■ Overall

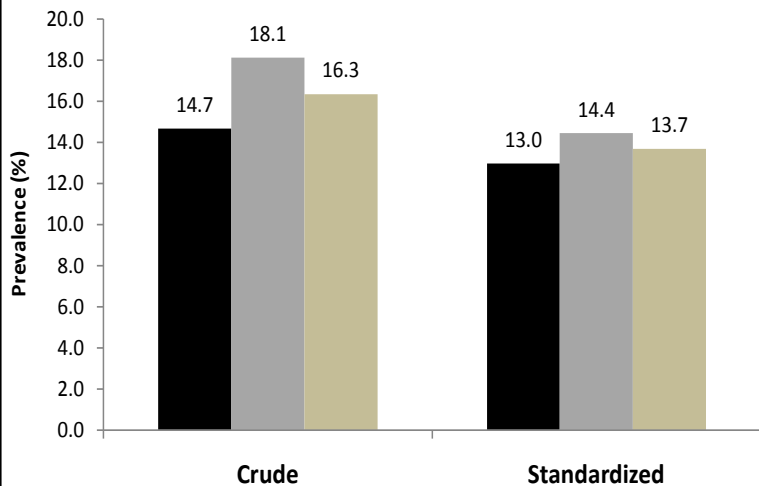

### B. Total Diabetes

■ Men ■ Women

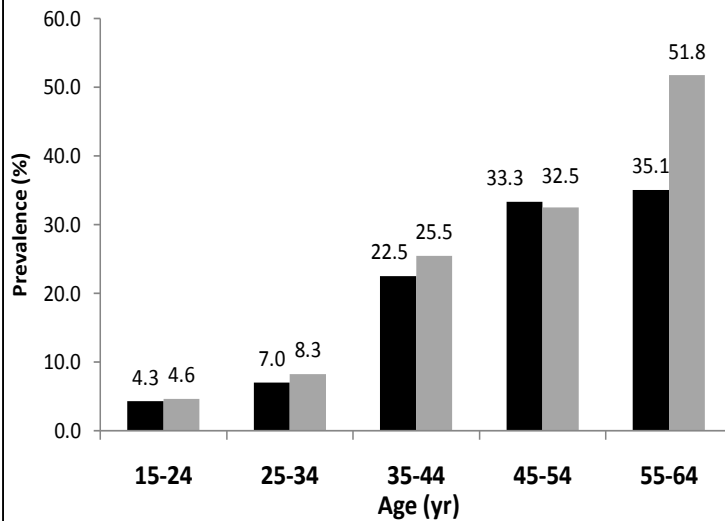

### C. Prediabetes

■ Men ■ Women ■ Overall

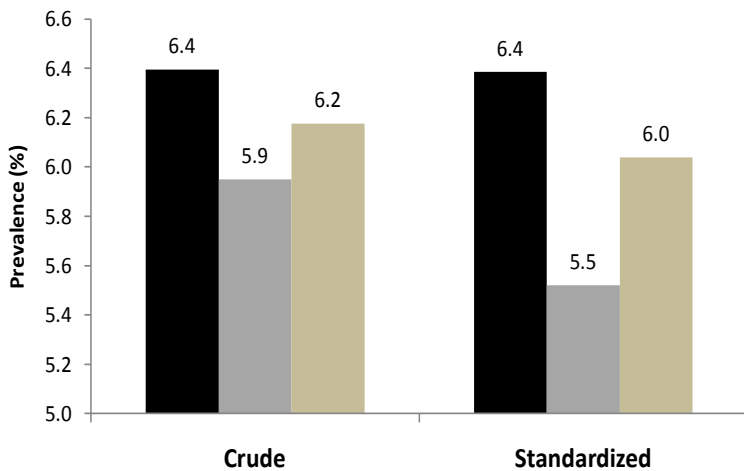

### D. Prediabetes

■ Men ■ Women

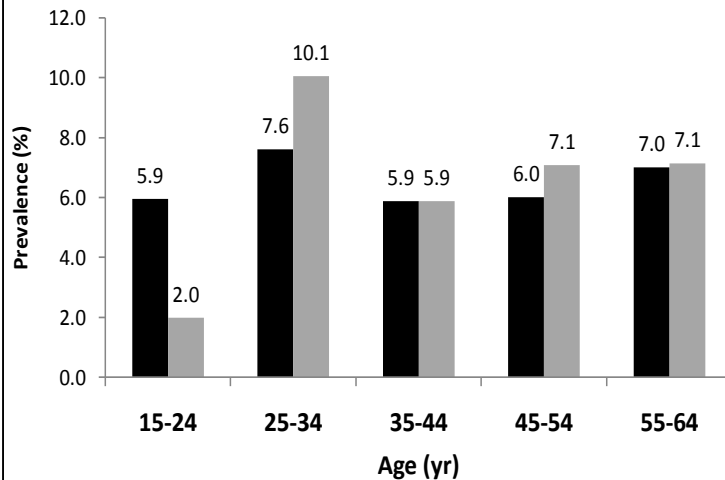

Supplement: MOESM1 [file 9489198]
